# Supplementary material for: Non-Invasive Biometrics and Machine Learning Modeling to Obtain Sensory and Emotional Responses from Panelists during Entomophagy
Source: PubMed Central journal article supplement (PMC7404998; doi:10.3390/foods9070903), 2020-07-09
Supplement: foods-09-00903-s001.pdf [file foods-09-00903-s001.pdf]

**Table S1.** Means and standard error of the self-reported responses for each sample per culture. Different letters denote significant differences based on ANOVA and Fishers least significant difference *post hoc* test ( $\alpha = 0.05$ ). .

| Culture*Sample/<br>Descriptors                                                                 | Appearance | FaceScale<br>Appearance | Aroma    | Texture | Flavor         | Overall<br>liking | FaceScale<br>Taste | Purchase<br>intention |
|------------------------------------------------------------------------------------------------|------------|-------------------------|----------|---------|----------------|-------------------|--------------------|-----------------------|
| Asian*        | 11.14ab    | 77.29ab                 | 10.45abc | 11.40ab | 11.25ab        | 11.35ab           | 78.18abc           | 9.94ab                |
|                                                                                                | ±0.55      | ±3.86                   | ±0.57    | ±0.59   | ±0.53          | ±0.55             | ±3.70              | ±0.84                 |
| Non-Asian*    | 12.00a     | 82.04a                  | 10.09bc  | 12.17a  | 11.76a         | 11.61a            | 79.67ab            | 10.58a                |
|                                                                                                | ±0.35      | ±2.18                   | ±0.40    | ±0.38   | ±0.34          | ±0.33             | ±2.28              | ±0.52                 |
| Asian*        | 11.17ab    | 75.33ab                 | 11.37a   | 11.60ab | 11.33ab        | 11.18abc          | 75.49abc           | 9.27abc               |
|                                                                                                | ±0.61      | ±3.65                   | ±0.48    | ±0.61   | ±0.62          | ±0.70             | ±4.51              | ±0.85                 |
| Non-Asian*   | 11.69ab    | 77.78ab                 | 11.09ab  | 11.75a  | 12.23a         | 12.22a            | 84.02a             | 10.95a                |
|                                                                                                | ±0.30      | ±2.22                   | ±0.34    | ±0.34   | ±0.31          | ±0.31             | ±2.02              | ±0.49                 |
| Asian*      | 10.54b     | 71.85b                  | 9.16c    | 10.85ab | <b>9.91bc</b>  | <b>10.14bc</b>    | 70.27bc            | <b>8.16bc</b>         |
|                                                                                                | ±0.54      | ±3.09                   | ±0.55    | ±0.66   | ±0.70          | ±0.66             | ±4.02              | ±0.85                 |
| Non-Asian*  | 11.15ab    | 77.06ab                 | 10.36abc | 12.01a  | <b>11.64a</b>  | <b>11.63a</b>     | 77.76abc           | <b>10.66a</b>         |
|                                                                                                | ±0.39      | ±2.34                   | ±0.42    | ±0.36   | ±0.37          | ±0.38             | ±2.37              | ±0.49                 |
| Asian*      | 5.94cd     | 43.77cd                 | 9.20c    | 9.20cd  | <b>9.09cd</b>  | <b>7.95d</b>      | <b>57.27d</b>      | <b>5.56d</b>          |
|                                                                                                | ±0.76      | ±5.14                   | ±0.60    | ±0.73   | ±0.75          | ±0.81             | ±5.31              | ±0.92                 |
| Non-Asian*  | 7.23c      | 51.54c                  | 9.86c    | 10.16bc | <b>11.20ab</b> | <b>9.83c</b>      | <b>69.78c</b>      | <b>7.81c</b>          |
|                                                                                                | ±0.52      | ±3.21                   | ±0.37    | ±0.46   | ±0.37          | ±0.43             | ±3.00              | ±0.56                 |
| Asian*      | 4.50de     | 36.09d                  | 6.54d    | 8.67d   | 9.01cd         | 8.14d             | 54.97d             | 5.62d                 |
|                                                                                                | ±0.66      | ±4.99                   | ±0.54    | ±0.78   | ±0.76          | ±0.82             | ±5.44              | ±0.80                 |
| Non-Asian*  | 3.81e      | 35.65d                  | 6.84d    | 8.93cd  | 8.16d          | 7.48d             | 59.36d             | 5.38d                 |
|                                                                                                | ±0.41      | ±2.96                   | ±0.34    | ±0.51   | ±0.42          | ±0.43             | ±3.20              | ±0.56                 |

**Table S2.** Means and standard error of the statistically significant biometric responses for each sample per culture. Different letters denote significant differences based on ANOVA and Fishers least significant difference *post hoc* test ( $\alpha = 0.05$ ).

| Culture*Sample/<br>Descriptors                                                                 | Roll     | Joy     | Engagement |  |  |
|------------------------------------------------------------------------------------------------|----------|---------|------------|-------------------------------------------------------------------------------------|-------------------------------------------------------------------------------------|
| Asian*        | -0.51ab  | 4.10abc | 15.14abc   | 1.74ab                                                                              | 2.11c                                                                               |
|                                                                                                | ±0.49    | ±1.59   | ±3.04      | ±0.74                                                                               | ±0.08                                                                               |
| Non-Asian*    | 0.01a    | 2.01c   | 13.39bc    | 0.43bc                                                                              | 2.07c                                                                               |
|                                                                                                | ±0.47    | ±0.71   | ±1.28      | ±0.18                                                                               | ±0.04                                                                               |
| Asian*        | 0.21a    | 6.68a   | 15.88ab    | 2.57a                                                                               | 2.40bc                                                                              |
|                                                                                                | ±0.70    | ±2.10   | ±2.45      | ±0.96                                                                               | ±0.12                                                                               |
| Non-Asian*   | -0.03a   | 2.35bc  | 13.21bc    | 0.59bc                                                                              | 2.27abc                                                                             |
|                                                                                                | ±0.66    | ±0.70   | ±1.51      | ±0.26                                                                               | ±0.11                                                                               |
| Asian*      | -1.66abc | 4.80abc | 18.84ab    | 1.22abc                                                                             | 2.47a                                                                               |
|                                                                                                | ±0.63    | ±2.07   | ±3.23      | ±0.52                                                                               | ±0.16                                                                               |
| Non-Asian*  | -0.48ab  | 1.18c   | 9.41c      | 0.29c                                                                               | 2.10c                                                                               |
|                                                                                                | ±0.60    | ±0.45   | ±1.10      | ±0.14                                                                               | ±0.06                                                                               |
| Asian*      | -2.25bc  | 7.05a   | 18.66ab    | 2.05a                                                                               | 2.11c                                                                               |
|                                                                                                | ±0.94    | ±2.06   | ±2.39      | ±0.74                                                                               | ±0.07                                                                               |
| Non-Asian*  | -0.20a   | 3.61abc | 13.40bc    | 0.64bc                                                                              | 2.21bc                                                                              |
|                                                                                                | ±0.94    | ±2.06   | ±2.39      | ±0.74                                                                               | ±0.07                                                                               |
| Asian*      | -2.77c   | 2.90abc | 15.39ab    | 1.06abc                                                                             | 2.10c                                                                               |
|                                                                                                | ±1.06    | ±0.92   | ±2.17      | ±0.54                                                                               | ±0.09                                                                               |
| Non-Asian*  | -0.11a   | 5.49ab  | 18.96a     | 1.31abc                                                                             | 2.12c                                                                               |
|                                                                                                | ±0.45    | ±1.53   | ±2.19      | ±0.49                                                                               | ±0.04                                                                               |
